# Supplementary material
Source: PubMed Central journal article supplement (PMC2928330)

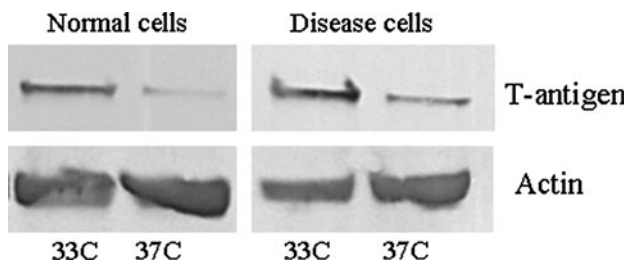

**SUPPLEMENTAL FIG. S1.** Immunoblot analysis of SV-40 large T-antigen.

Supplement: Supp_Fig.pdf [file Supp_Fig.pdf]
